# Supplementary material for: Disassembly-driven colorimetric and fluorescent sensor for anionic surfactants in water based on a conjugated polyelectrolyte/dye complex
Source: Royal Society of Chemistry journal article supplement (doi:10.1039/c1sm05526g), 2011-01-01
Supplement: c1sm05526g.pdf [file c1sm05526g.pdf]

*Supplementary Information for*

# **Disassembly-driven colorimetric and fluorescent sensor for anionic surfactants in water based on conjugated polyelectrolyte/dye complex**

Yuxiu An, Hua Bai, Chun Li\* and Gaoquan Shi

*Department of Chemistry, Tsinghua University, Beijing 100084, China*

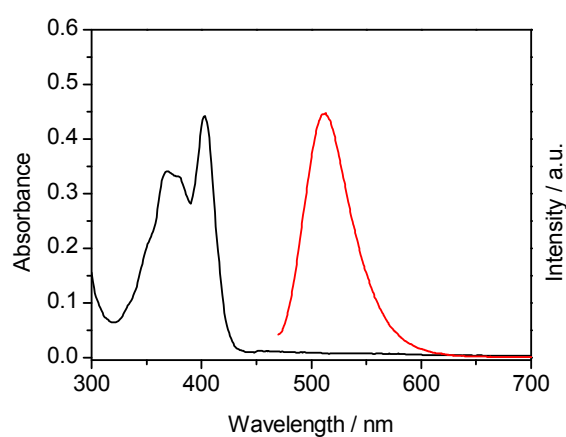

**Fig. S1** Absorption (black) and emission (red) spectra of HPTS in water (pH 5.8).  $\lambda_{\text{ex}} = 400 \text{ nm}$ .

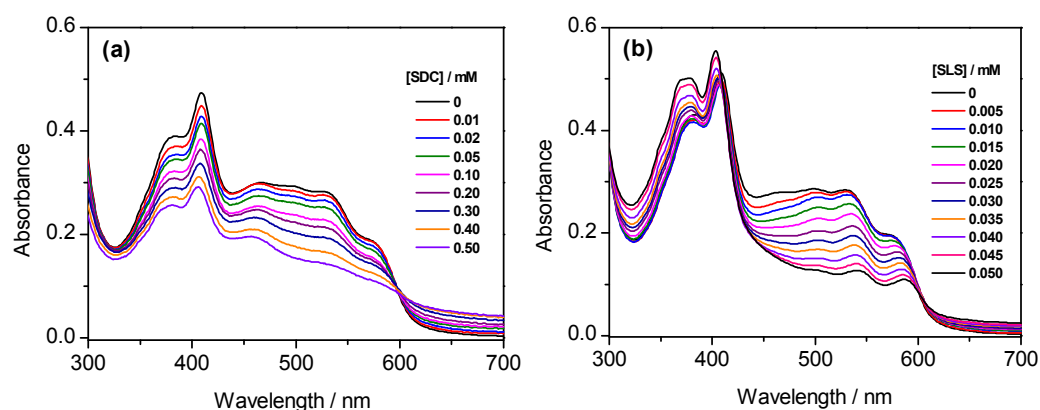

**Fig. S2** Variation in the absorption spectra of PMTPA (0.05 mM)/ HPTS (0.015 mM) in water (pH 5.8) with increasing concentrations of SDC (a) and SLS (b) as indicated.
